# Supplementary material for: Reduced graphene oxide intercalated ZnS nanoparticles as an efficient and durable electrocatalyst for the oxygen reduction reaction
Source: Royal Society of Chemistry journal article supplement (doi:10.1039/c8nj04508a), 2018-01-01
Supplement: c8nj04508a1.pdf [file c8nj04508a1.pdf]

## Supporting Information

### **Reduced graphene oxide intercalated ZnS nanoparticles as an efficient and durable electrocatalyst for oxygen reduction reaction**

Zhankun Jiang\*, Jiemei Yu, Xianzhen Song, Wenjie Yang, Hengyi Fang, Guoxin Sun, Taizhong Huang\*\*

School of Chemistry and Chemical Engineering, University of Jinan, Jinan 250022, China

\*Zhankun Jiang: [chm\\_jiangzk@ujn.edu.cn](mailto:chm_jiangzk@ujn.edu.cn);

\*\*Taizhong Huang: [chm\\_huangtz@ujn.edu.cn](mailto:chm_huangtz@ujn.edu.cn)

## Instrumentation and Measurements

The prepared catalysts were structurally characterized by using X-ray diffraction (XRD). XRD patterns were recorded on a glass wafer by a Rigaku MiniFlex II diffractometer with a slit of 1.25 at a scanning rate of 10°/min using Cu-K $\alpha$  radiation ( $\lambda = 1.5406 \text{ \AA}$ ). The morphology of the prepared catalysts was studied using scanning electron microscopy (SEM, JEOL JSM-6701F electron microscope operating at 5 KV). Transmission electron microscopy (TEM) images were examined according to a Philips Tecnai 20U-TWIN transmission electron microscope with linear resolution of 0.14 nm and dot resolution of 0.19 nm.

X-ray photoelectron spectroscopy (XPS) measurements were taken with an ESCALABMKII X-ray photoelectron spectrometer (VG Scienta, USA) equipped with a monochromatic Al K $\alpha$  X-ray source (1486.6 eV). The pressure in the chamber during the measurements was kept at  $1 \times 10^{-7}$  Pa. The analyzer was operated at a pass energy of 50 eV for high resolution scans. The binding energy of the C 1s peak at 284.6 eV was taken as a reference for the binding energy calibration. A background subtraction and peak fitting were deconvolved using the XPS peak fitting software (XPSPEAK41 by Prof. R. W. M. Kwok).

---

## Electrode preparation and electrochemical tests

The electrochemical characterization were tested according to a CHI 760D electrochemical workstation. In the electrochemical testing system, a saturated calomel electrode (Hg/Hg<sub>2</sub>Cl<sub>2</sub>) was the reference electrode, a platinum wire was the counter-electrode and glassy carbon (GC) electrode with catalysts was the working electrode. The electrolyte solution was 0.1 mol/L KOH. The working electrode was prepared by the following: 5.0 mg catalyst was dispersed in the mixture of 50 µl Nafion solution and 450 µl DI water. The mixture was sonicated for at least 40 min to form a homogeneous ink. Then 5.0 µl of the ink was dropped onto a polished glassy-carbon electrode (GCE, 3 mm in diameter) and fully dried. Before electrochemical tests, the working electrode was conducted at a sweeping rate of 100 mV/s between 0.2 and -0.8 V versus Hg/Hg<sub>2</sub>Cl<sub>2</sub> until reproducible results were obtained. Thereafter, the electrolyte was saturated with oxygen and cyclic voltammogram tests were conducted for oxygen reduction from 0.2 to -0.8 V versus Hg/Hg<sub>2</sub>Cl<sub>2</sub> at sweeping rates of 5, 10, 20, 50 and 100 mV s<sup>-1</sup>, respectively. The linearly sweeping voltammetry (LSV) and Tafel tests were conducted at the sweeping rate of 5 mV/s. The electrochemical impedance spectroscopy (EIS) tests were carried out at a half wave potential from 1 to 10<sup>5</sup> Hz. The long-time running stability test was recorded for 16000 s at the potential of -0.2 V versus Hg/Hg<sub>2</sub>Cl<sub>2</sub>.

The rotating disc electrode (RDE) and rotating ring disc electrode (RRDE) tests were carried out on a RRDE-3A rotating ring disc electrode combined with CHI 760D. The RDE tests were conducted with the sweeping rate of 5 mV/s at different rotating speed. RRDE tests were carried out on a rotating speed of 1600 rpm with the sweeping rate of 5 mV/s.

The *Koutechy–Levich* plots can be analyzed for determining the electron transfer number (n) at various electrode potentials.

$$\frac{1}{j} = \frac{1}{j_k} + \frac{1}{B\omega^{0.5}} \quad (1)$$

$$B = 0.62nF(D_{O_2})^{2/3}v^{-1/6}C_{O_2} \quad (2)$$

---

Where  $j_k$  is the kinetic current and  $w$  is the angular velocity ( $w = 2\pi N$ ,  $N$  is the linear rotation speed).  $B$  could be determined from the slope of the K–L plots based on the *Koutechy–Levich* equation.  $n$  represents the transferred electron number,  $F$  is the Faraday constant ( $F = 96485 \text{ C mol}^{-1}$ ),  $D_{O_2}$  is the diffusion coefficient of  $O_2$  in  $0.1 \text{ mol L}^{-1}$  KOH ( $1.9 \times 10^{-5} \text{ cm}^2 \text{ s}^{-1}$ ),  $\nu$  is the kinetic viscosity ( $0.01 \text{ cm}^2 \text{ s}^{-1}$ ), and  $C_{O_2}$  is the bulk concentration of  $O_2$  ( $1.2 \times 10^{-7} \text{ mol (cm}^3)^{-1}$ ).

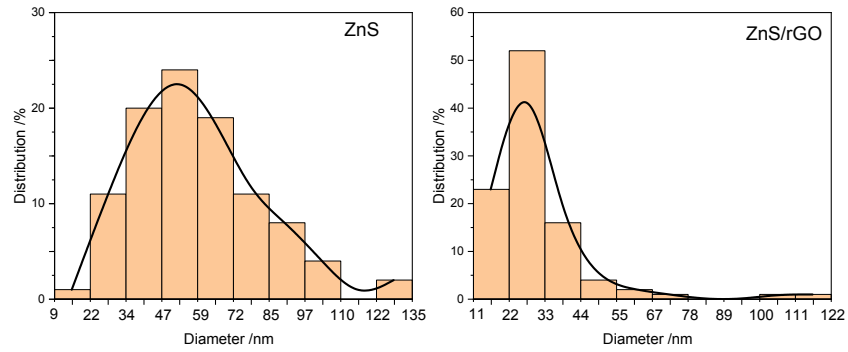

Fig. S1 The size distributions estimated from TEM graph.
